# Supplementary material for: Comparative Study of Adenosine Analogs as Inhibitors of Protein Arginine Methyltransferases and a Clostridioides difficile-Specific DNA Adenine Methyltransferase
Source: PubMed Central journal article supplement — ACS Chem Biol. 2023 Feb 22;18(4):734–45. doi: 10.1021/acschembio.3c00035 (PMC10127221; doi:10.1021/acschembio.3c00035), 2023-02-22

## SUPPORTING INFORMATION

### **Comparative study of adenosine analogs as inhibitors of protein arginine methyltransferases and a *Clostridioides difficile*-specific DNA adenine methyltransferase**

Jujun Zhou<sup>1,8</sup>, Youchao Deng<sup>2,8</sup>, Iredia D. Iyamu<sup>2</sup>, John R. Horton<sup>1</sup>, Dan Yu<sup>1</sup>, Taraneh Hajian<sup>3</sup>, Masoud Vedadi<sup>3,4</sup>, Dante Rotili<sup>5</sup>, Antonello Mai<sup>5,6</sup>, Robert M. Blumenthal<sup>7</sup>, Xing Zhang<sup>1</sup>, Rong Huang<sup>2,\*</sup>, and Xiaodong Cheng<sup>1,\*</sup>

<sup>1</sup>Department of Epigenetics and Molecular Carcinogenesis, University of Texas MD Anderson Cancer Center, Houston, TX 77030, USA

<sup>2</sup>Department of Medicinal Chemistry and Molecular Pharmacology, Institute for Drug Discovery, Center for Cancer Research, Purdue University, West Lafayette, IN 47907, USA

<sup>3</sup>Drug Discovery Program, Ontario Institute for Cancer Research, Toronto, ON M5G 0A3, Canada

<sup>4</sup>Department of Pharmacology and Toxicology, University of Toronto, ON M5S 1A8, Canada

<sup>5</sup>Department of Drug Chemistry and Technologies, Sapienza University of Rome, P.le A. Moro 5, 00185 Rome, Italy

<sup>6</sup>Pasteur Institute, Cenci-Bolognetti Foundation, Sapienza University of Rome, P.le A. Moro 5, 00185 Rome, Italy

<sup>7</sup>Department of Medical Microbiology and Immunology, and Program in Bioinformatics, The University of Toledo College of Medicine and Life Sciences, Toledo, OH 43614, USA

<sup>8</sup>These authors contributed equally to this work

\* Correspondence: huang-r@purdue.edu (RH); XCheng5@mdanderson.org (XC)

|                                                                      |         |
|----------------------------------------------------------------------|---------|
| Table S1. Summary of X-ray data collection and refinement statistics | Page S3 |
| Table S2. Inhibition reaction conditions                             | S4      |
| Figure S1. Raw data of IC <sub>50</sub> plots                        | S5      |
| Reference                                                            | S5      |
| NMR spectra of compound <b>11a</b>                                   | S6      |
| NMR spectra of compound <b>11b</b>                                   | S7      |
| HR-MS spectra of compounds <b>11a</b> and <b>11b</b>                 | S8      |
| Purity of compounds <b>11a</b> and <b>11b</b>                        | S9      |

**Table S1.** Summary of X-ray data collection and refinement statistics\* at SERCAT beamline 22ID,  $\lambda=1.0000 \text{ \AA}$ 

| Compound                                                        | <b>11a</b> (YD905)     | <b>11b</b> (YD907)     |
|-----------------------------------------------------------------|------------------------|------------------------|
| PDB Code                                                        | 8FS1                   | 8FS2                   |
| Date Collected                                                  | 2021-12-05             | 2021-12-05             |
| Space group                                                     | $P2_12_12_1$           |                        |
| Cell dimensions ( $\text{\AA}$ )                                | 80.91, 160.73, 229.62  | 81.26, 161.25, 229.60  |
| $\alpha, \beta, \gamma$ ( $^\circ$ )                            | 90, 90, 90             |                        |
| Resolution ( $\text{\AA}$ )                                     | 44.95-2.74 (2.84-2.74) | 44.16-2.59 (2.68-2.59) |
| <sup>a</sup> $R_{\text{merge}}$                                 | 0.415 (2.497)          | 0.270 (2.329)          |
| $R_{\text{pim}}$                                                | 0.109 (0.776)          | 0.072 (0.722)          |
| $CC_{1/2}$                                                      | 0.984 (0.417)          | 0.995 (0.422)          |
| <sup>b</sup> $\langle I/\sigma I \rangle$                       | 9.9 (1.1)              | 10.2 (0.9)             |
| Completeness (%)                                                | 98.9 (95.4)            | 98.0 (87.7)            |
| Redundancy                                                      | 13.7 (9.4)             | 12.9 (7.9)             |
| Observed reflections                                            | 1,084,680              | 1,202,139              |
| Unique reflections                                              | 79,171 (7780)          | 93,121 (8376)          |
| Wilson B-factor ( $\text{\AA}^2$ )                              | 48.3                   | 53.5                   |
| <b>Refinement</b>                                               |                        |                        |
| Resolution ( $\text{\AA}$ )                                     | 2.74                   | 2.59                   |
| No. reflections                                                 | 78,515                 | 92,780                 |
| <sup>c</sup> $R_{\text{work}}$ / <sup>d</sup> $R_{\text{free}}$ | 0.172 / 0.214          | 0.173 / 0.207          |
| No. Atoms                                                       |                        |                        |
| Protein                                                         | 13,309                 | 13,318                 |
| DNA                                                             | 1704                   | 1704                   |
| Inhibitor                                                       | 123                    | 126                    |
| Solvent                                                         | 517                    | 513                    |
| B Factors ( $\text{\AA}^2$ )                                    |                        |                        |
| Protein                                                         | 54.2                   | 61.7                   |
| DNA                                                             | 61.3                   | 71.0                   |
| Inhibitor                                                       | 68.4                   | 83.0                   |
| Solvent                                                         | 43.5                   | 51.4                   |
| <b>R.m.s. deviations</b>                                        |                        |                        |
| Bond lengths ( $\text{\AA}$ )                                   | 0.006                  | 0.008                  |
| Bond angles ( $^\circ$ )                                        | 0.84                   | 0.83                   |

\* Values in parenthesis correspond to highest resolution shell;

<sup>a</sup>  $R_{\text{merge}} = \sum |I - \langle I \rangle| / \sum I$ , where  $I$  is the observed intensity and  $\langle I \rangle$  is the averaged intensity from multiple observations; <sup>b</sup>  $\langle I/\sigma I \rangle =$  averaged ratio of the intensity ( $I$ ) to the error of the intensity ( $\sigma I$ );

<sup>c</sup>  $R_{\text{work}} = \sum |F_{\text{obs}} - F_{\text{cal}}| / \sum |F_{\text{obs}}|$ , where  $F_{\text{obs}}$  and  $F_{\text{cal}}$  are the observed and calculated structure factors, respectively; <sup>d</sup>  $R_{\text{free}}$  was calculated using a randomly chosen subset (5%) of the reflections not used in refinement.

**Table S2.** Inhibition reaction conditions at [I]=10  $\mu$ M

| Enzyme         | Concentrations                                        | t (min) | Buffer                                                         | Substrate (target <b>A</b> in red and underlined)                                        |
|----------------|-------------------------------------------------------|---------|----------------------------------------------------------------|------------------------------------------------------------------------------------------|
| CamA           | [E]=0.1 $\mu$ M<br>[SAM]=40 $\mu$ M<br>[S]=5 $\mu$ M  | 1.5     | 50 mM Tris-HCl pH 7.5<br>100 mM NaCl<br>1 mM DTT<br>0.25% DMSO | 5' -CGATTCAAAA <u><b>A</b></u> GTCCCAAG-3'<br>3' -GCTAAGTTTTTCAGGGTTC-5'                 |
| CcrM           |                                                       | 5       |                                                                | 5' -CG <u><b>A</b></u> TTCAAAAAGTCCCAAG-3'<br>3' -GCTA <u><b>A</b></u> GTTTTTCAGGGTTC-5' |
| DAM            |                                                       | 1.5     |                                                                | 5' -CCGCGG <u><b>A</b></u> TCCTGCT-3'<br>3' -GGCGCCT <u><b>A</b></u> GGACGA-5'           |
| MettL5-Trm112  |                                                       | 60      |                                                                | 5' -UCGUA <u><b>A</b></u> CAAGGUUU-3'                                                    |
| PCIF1          |                                                       | 15      |                                                                | m7Gppp <u><b>A</b></u> <sub>m</sub> G (A <sub>m</sub> =2'-O-methyladenosine)             |
| MettL3-MettL14 | [E]=0.1 $\mu$ M<br>[SAM]=40 $\mu$ M<br>[S]=10 $\mu$ M | 10      | 50 mM HEPES pH 7.5<br>5 mM NaCl<br>1 mM DTT<br>0.25% DMSO      | 5' -AACAGAAUGGG <u><b>A</b></u> CUGUUC-3'                                                |
| MettL16        | [E]=0.4 $\mu$ M<br>[SAM]=160 $\mu$ M<br>[S]=5 $\mu$ M | 30      | 20 mM Tris-HCl pH 8.0<br>400 mM NaCl<br>1 mM DTT<br>0.25% DMSO | 5' -GGUUGGCGUAGGCUAC <u><b>A</b></u> GAGAAGCCAACC-3'                                     |

Figure S1

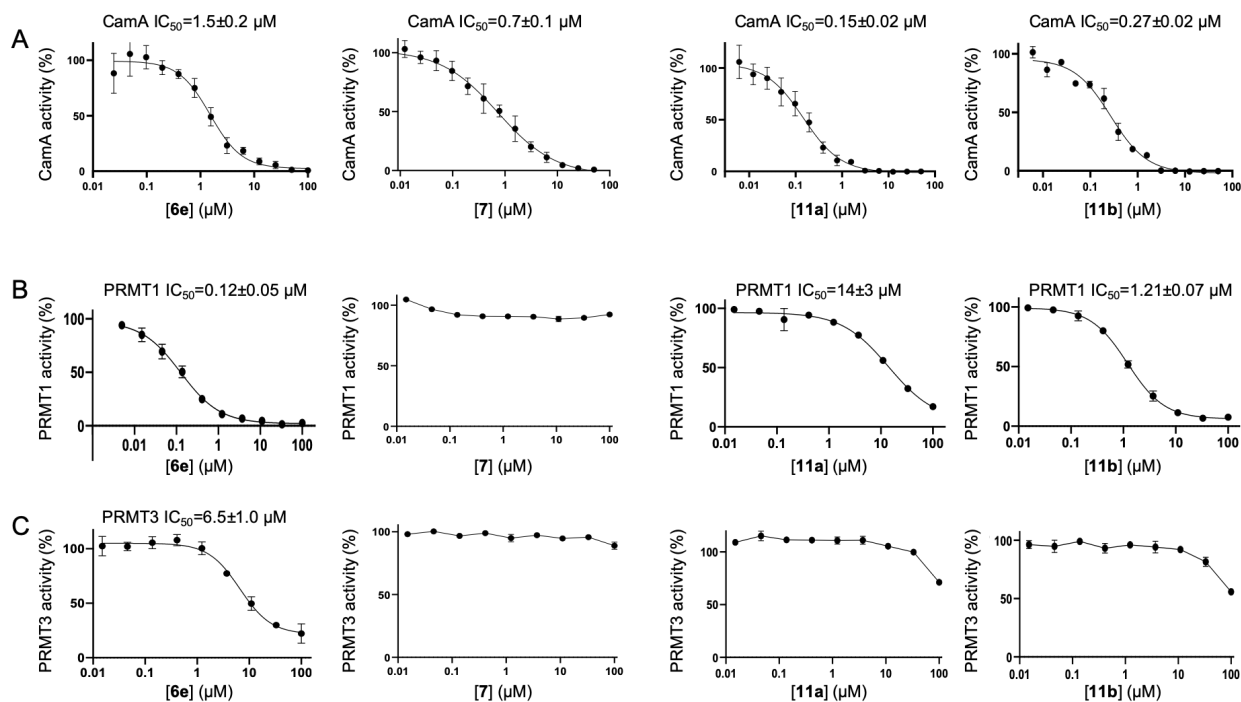

**Figure S1.** Related to Figure 2C, raw data plots of  $IC_{50}$  values for the four compounds (from left to right) **6e**, **7**, **11a**, and **11b** against (A) CamA, (B) PRMT1, and (C) PRMT3. Note the compound **7** for CamA is taken from reference <sup>1</sup>.

## Reference

- Zhou, J.; Horton, J. R.; Menna, M.; Fiorentino, F.; Ren, R.; Yu, D.; Hajian, T.; Vedadi, M.; Mazzocanti, G.; Ciogli, A.; Weinhold, E.; Huben, M.; Blumenthal, R. M.; Zhang, X.; Mai, A.; Rotili, D.; Cheng, X., Systematic Design of Adenosine Analogs as Inhibitors of a *Clostridioides difficile*-Specific DNA Adenine Methyltransferase Required for Normal Sporulation and Persistence. *J Med Chem* **2023**, *66* (1), 934-950.

# NMR spectra of compound 11a (YD9-05)

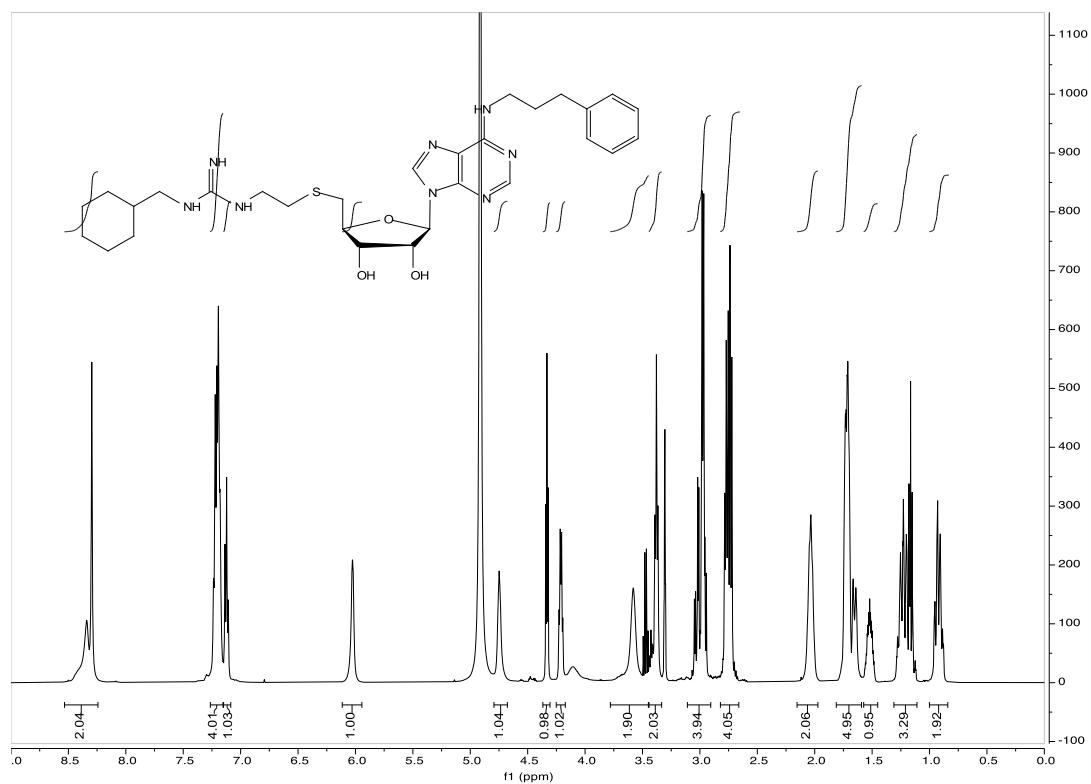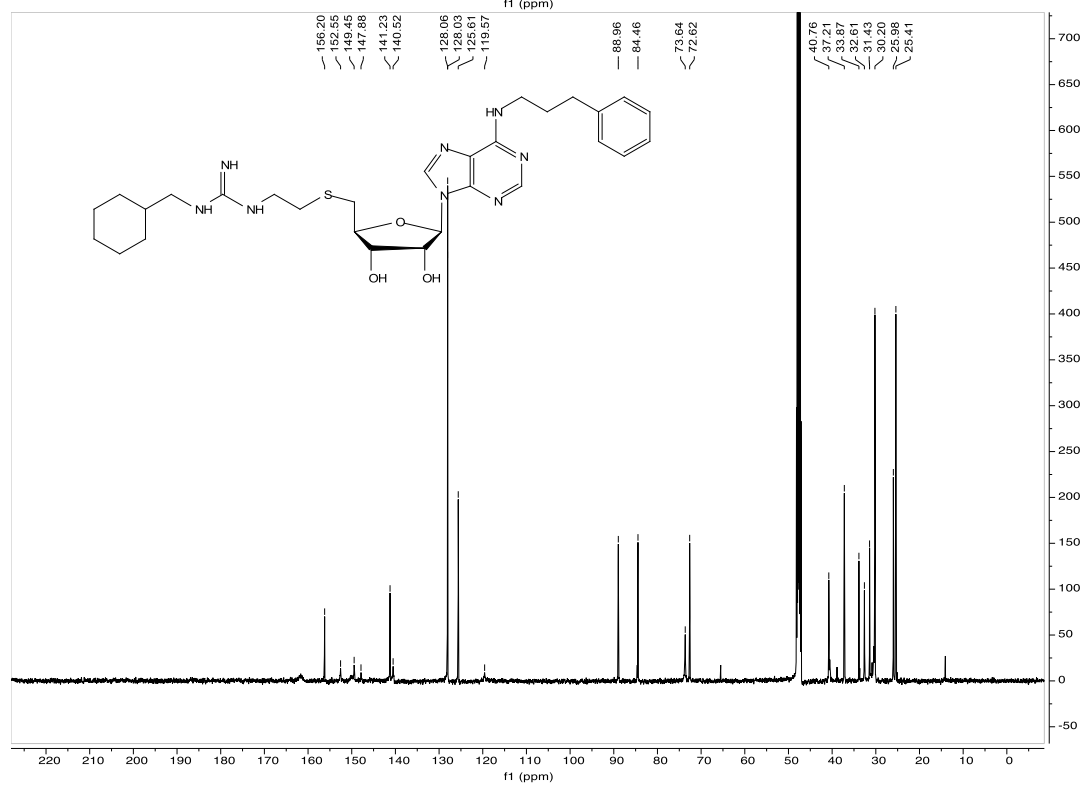

# NMR spectra of compound 11b (YD9-07)

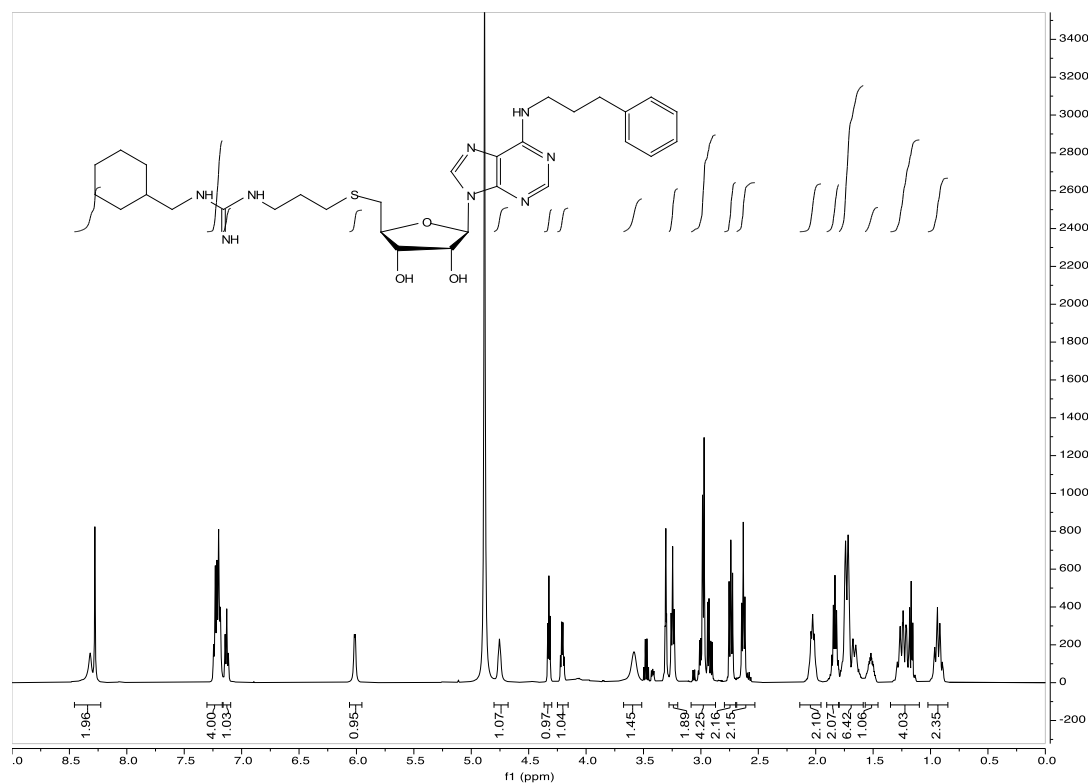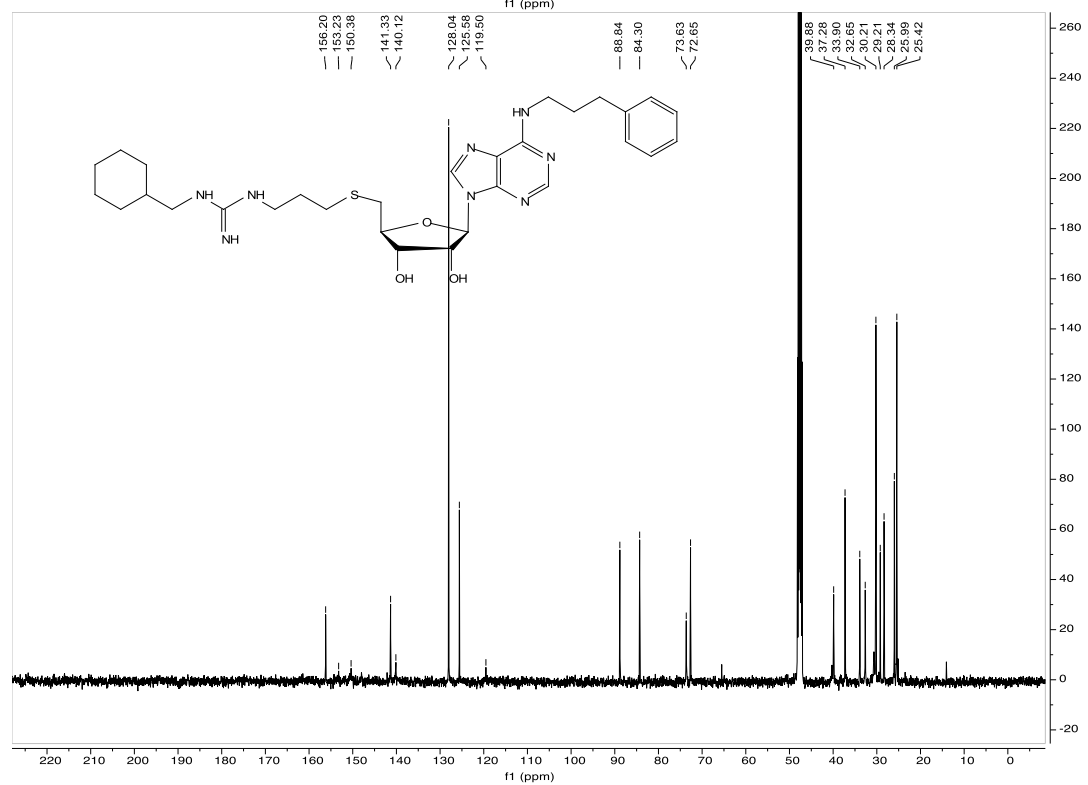

## HRMS spectra of compounds (11a and 11b)

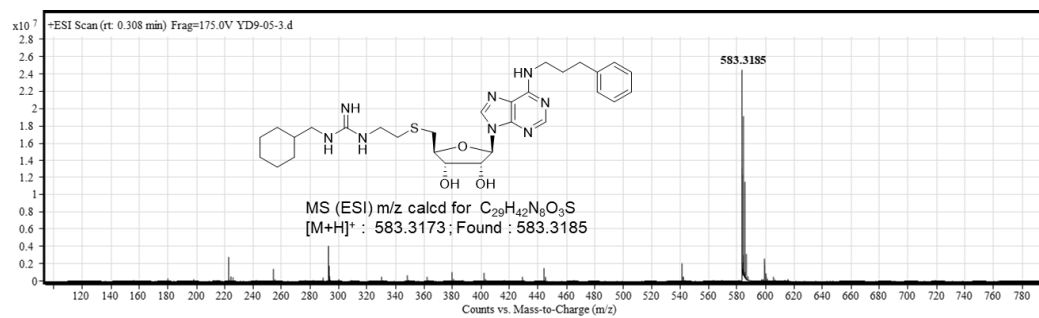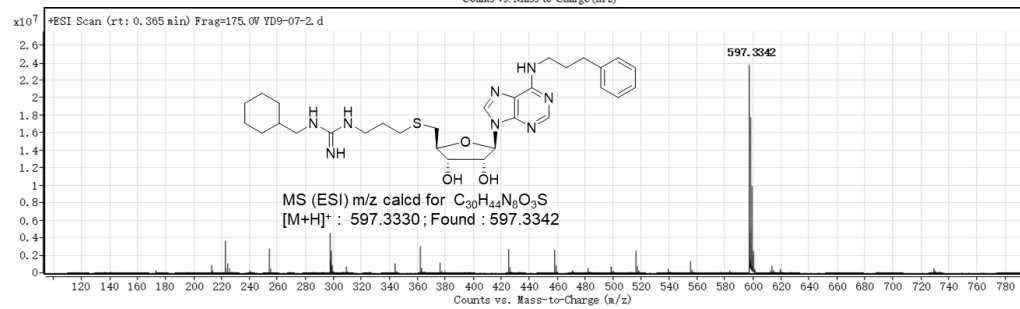



**Purity of compounds 11a (YD9-05) and 11b (YD9-07) (>95%)**

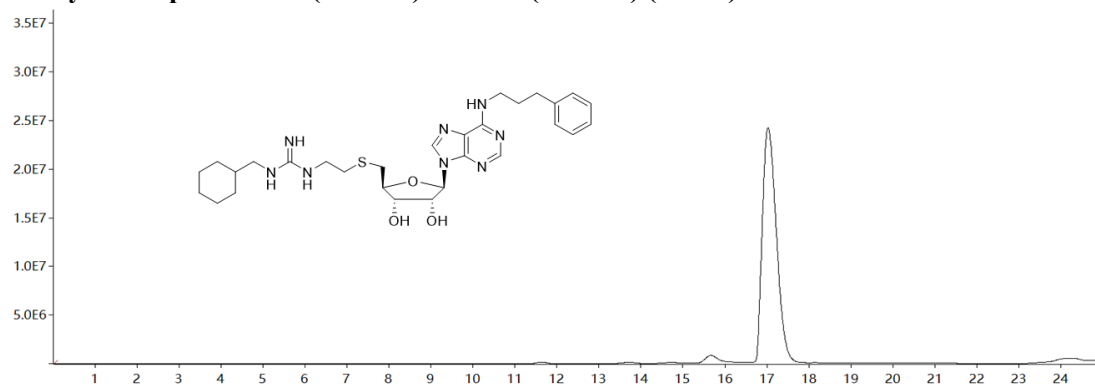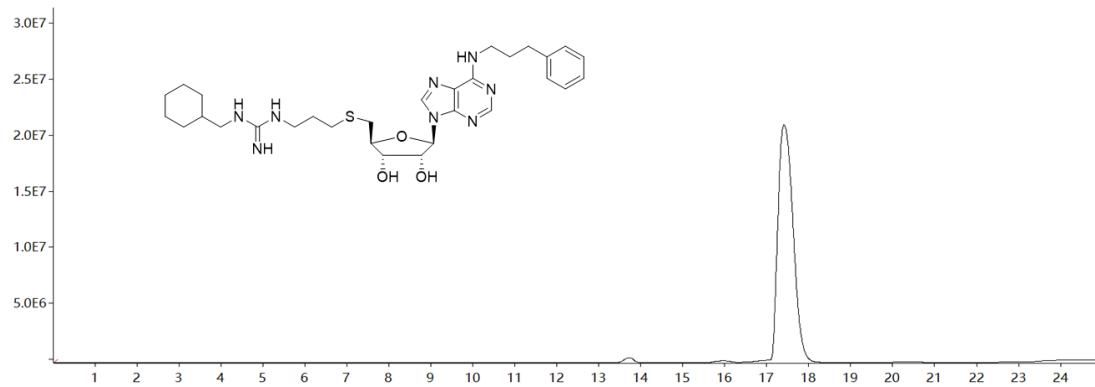

Supplement: cb3c00035_si_001.pdf [file cb3c00035_si_001.pdf]
